# Supplementary material for: Development of canine PD-1/PD-L1 specific monoclonal antibodies and amplification of canine T cell function
Source: PubMed Central journal article supplement (PMC7332054; doi:10.1371/journal.pone.0235518), 2020-07-02

S1 Fig Original

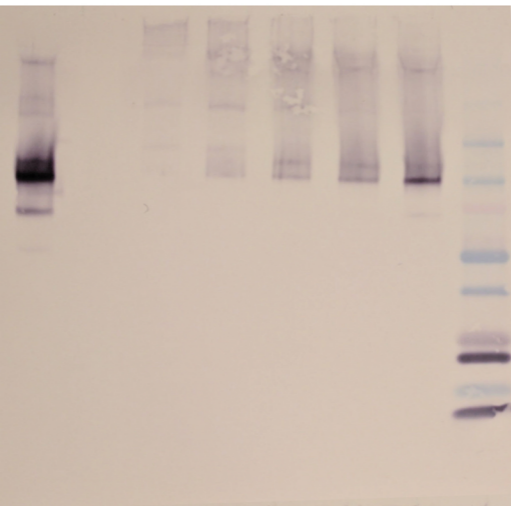

S2 Fig Original

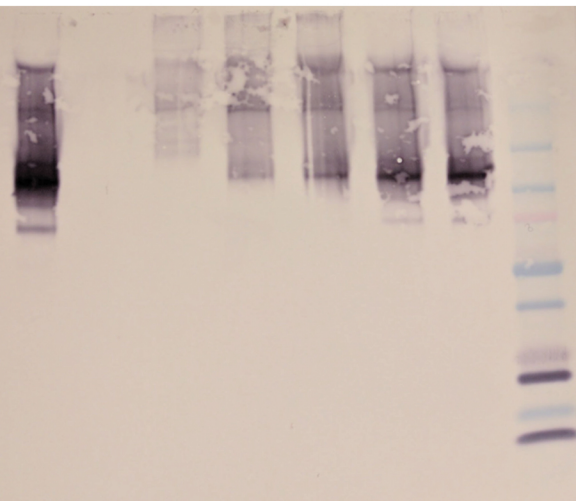

# S8 Fig JC053 Original

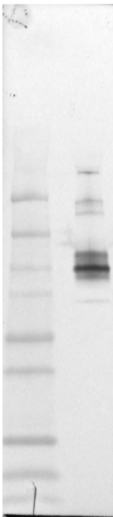

# S9 Fig JC071 Original

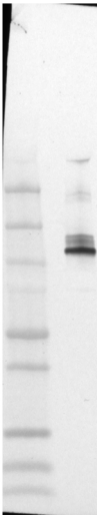

# S8-9 Fig SA-AP Original

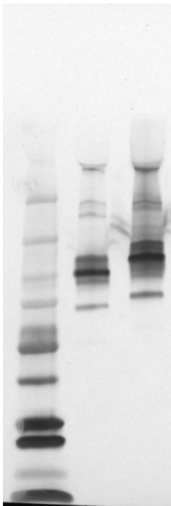

Supplement: pone.0235518.s012.pdf [file pone.0235518.s012.pdf]
